# Supplementary material for: Allantoin-loaded porous silica nanoparticles/polycaprolactone nanofiber composites: fabrication, characterization, and drug release properties
Source: Royal Society of Chemistry journal article supplement (doi:10.1039/c5ra22199d), 2015-12-09
Supplement: c5ra22199d1.pdf [file c5ra22199d1.pdf]

## **Allantoin-loaded porous silica nanoparticles / polycaprolacton nanofiber composites: fabrication, characterization and drug release properties**

Ma Ke<sup>a</sup>, Jatoi Abdul Wahab<sup>a,b</sup>, Bang Hyunsik<sup>a</sup>, Kyung-Hun Song<sup>c</sup>, Jung Soon Lee<sup>d</sup>, Mayakrishnan Gopiraman<sup>a,\*</sup>, Ick Soo Kim<sup>a,\*</sup>

<sup>a</sup>*Nano Fusion Technology Research Group, Department of Bioscience and Technology, Interdisciplinary Graduate School of Science and Technology, Shinshu University, Tokida, Ueda, Nagano Prefecture, 386-8567, Japan. E-mail addresses: [kim@shinshu-u.ac.jp](mailto:kim@shinshu-u.ac.jp) (I.S. Kim) and [gopiramannitt@gmail.com](mailto:gopiramannitt@gmail.com) (M. Gopiraman).*

<sup>b</sup>*Nanomaterials Research Lab., Department of Textile Engineering, Mehran University of Engineering and Technology, Jamshoro, Sindh, Pakistan*

<sup>c</sup>*Department of Clothing & Textiles, PaiChai University, Daejeon 302-735, South Korea*

<sup>d</sup>*Department of Clothing and Textiles, Chungnam National University, Daejeon 305-764, South Korea*

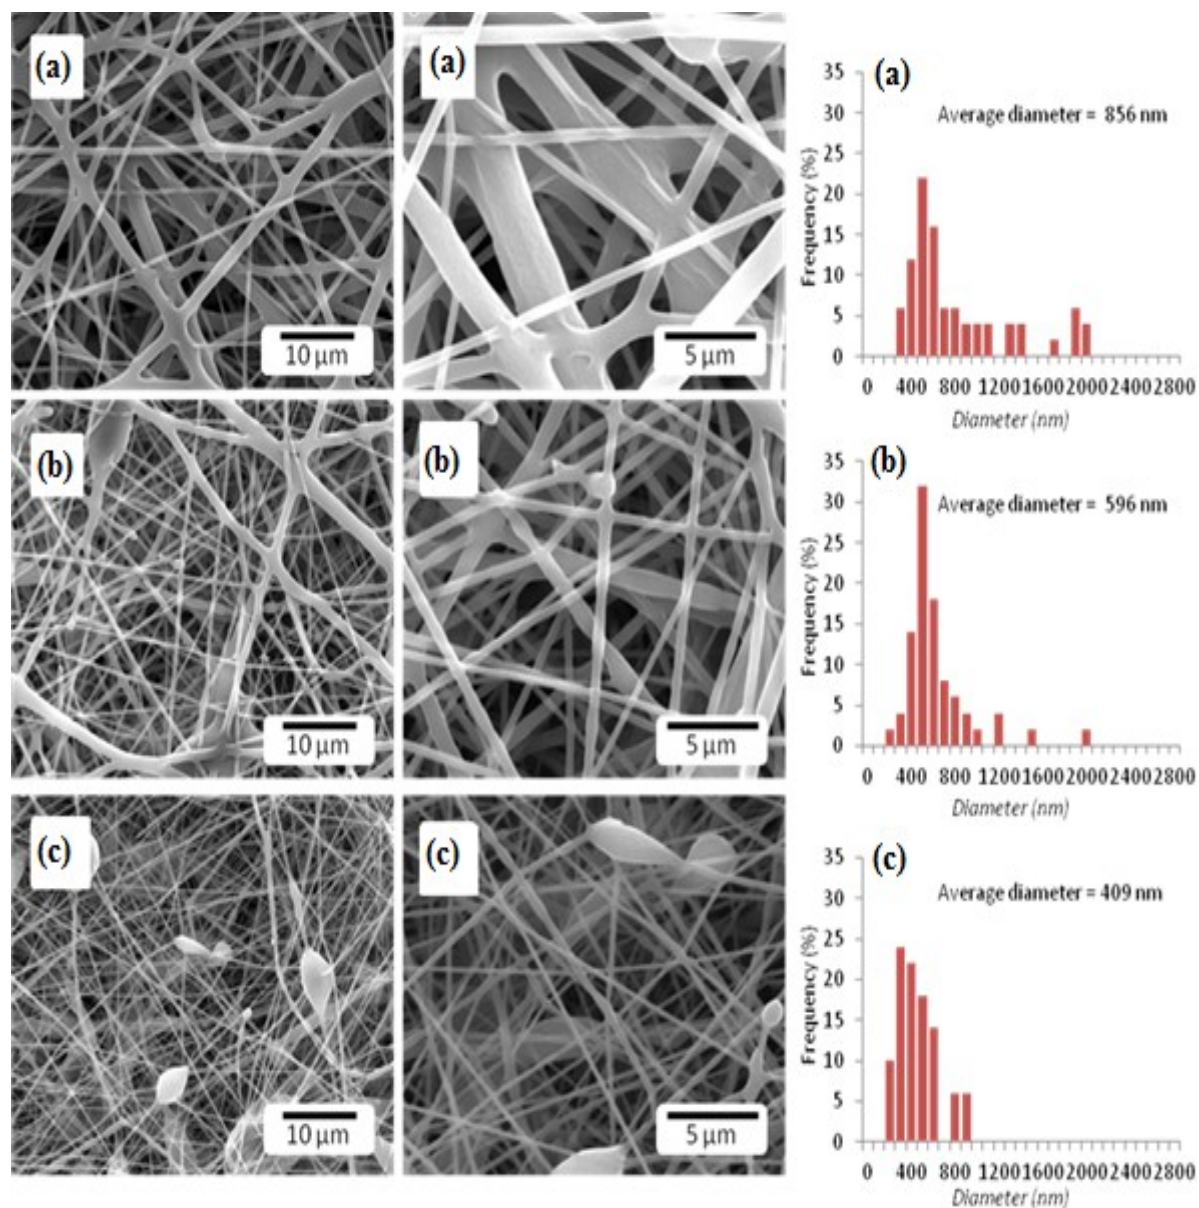

**Fig. S1** SEM images and diameter distribution for 8 wt% PCL **(a)** DCM: DMF = 8:2 **(b)** DCM: DMF = 6:4 **(c)** DCM: DMF = 4:6

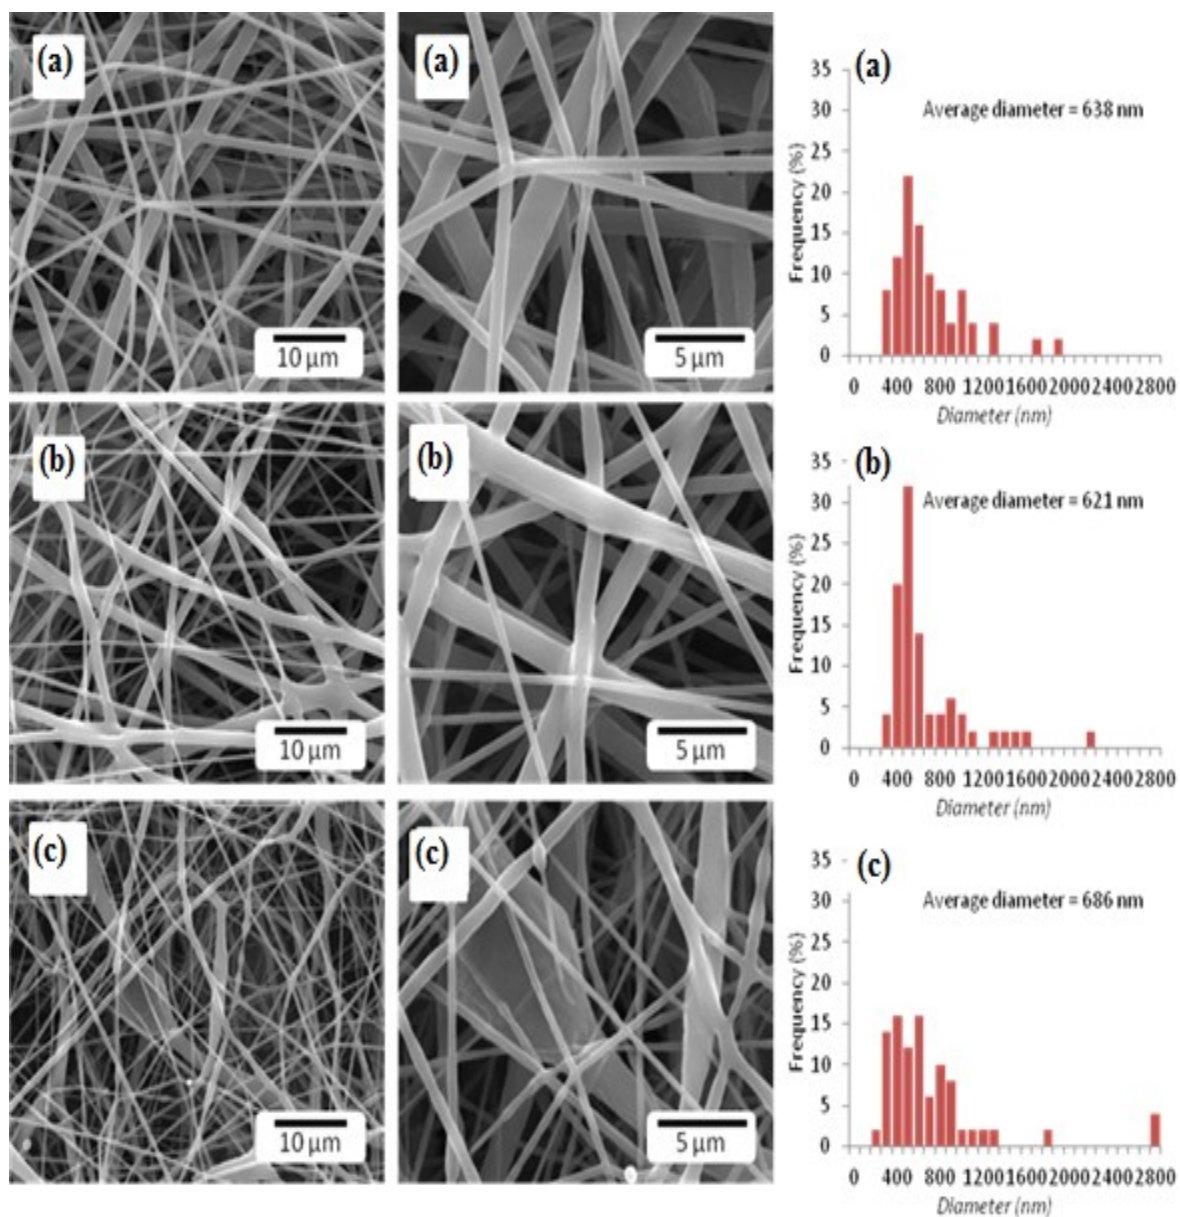

**Fig.S2** SEM images and diameter distribution for 10 wt% PCL **(a)** DCM: DMF = 8:2  
**(b)** DCM: DMF = 6:4 **(c)** DCM: DMF = 4:6

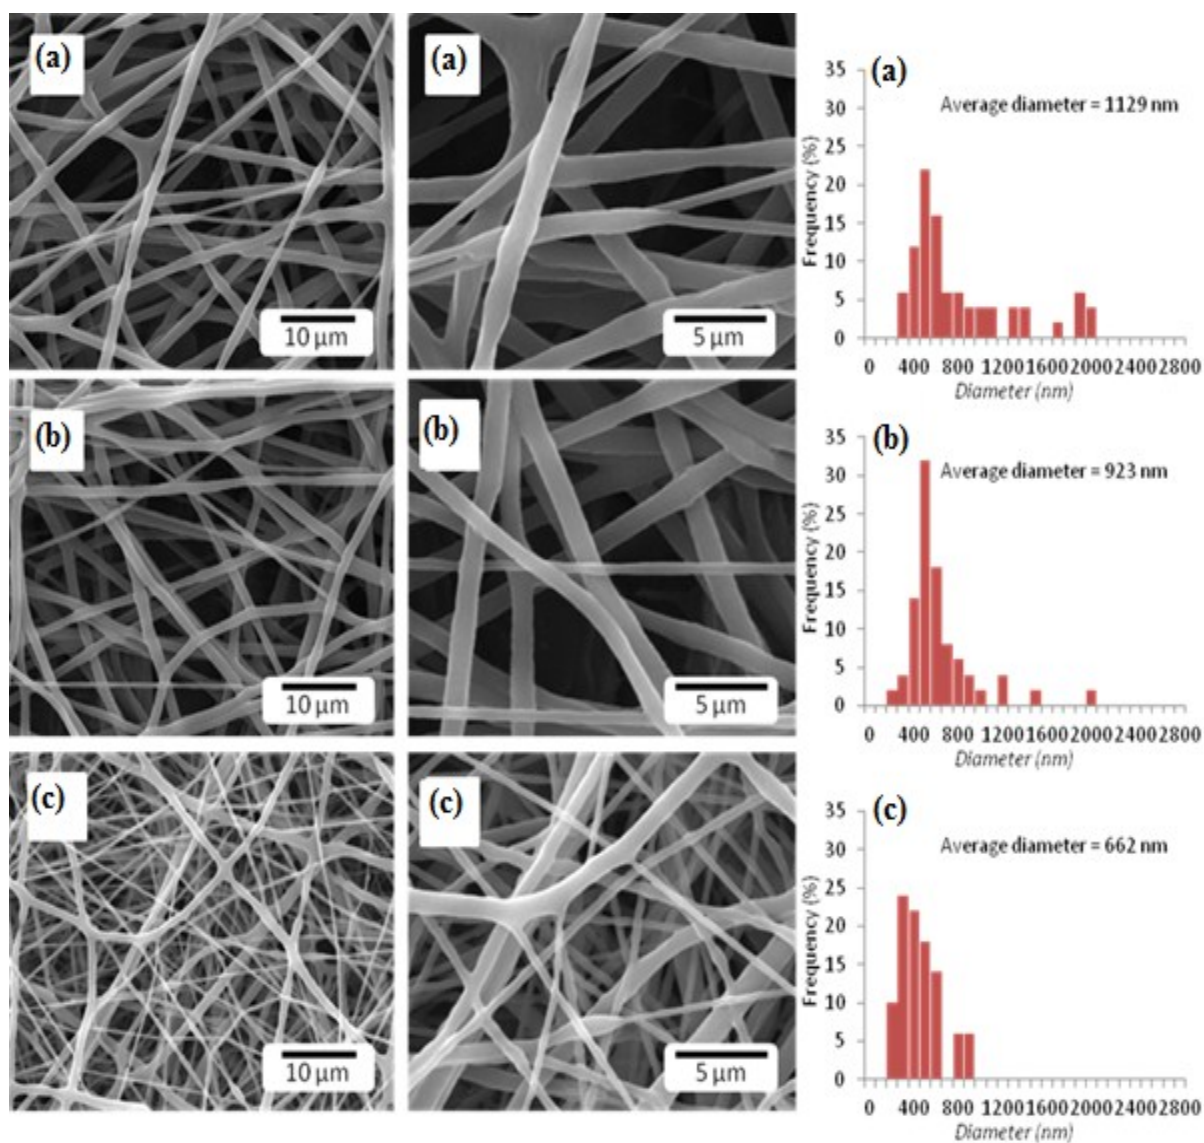

**Fig. S3** SEM images and diameter distribution for 12 wt% PCL (a) DCM: DMF = 8:2  
 (b) DCM: DMF = 6:4 (c) DCM: DMF = 4:6



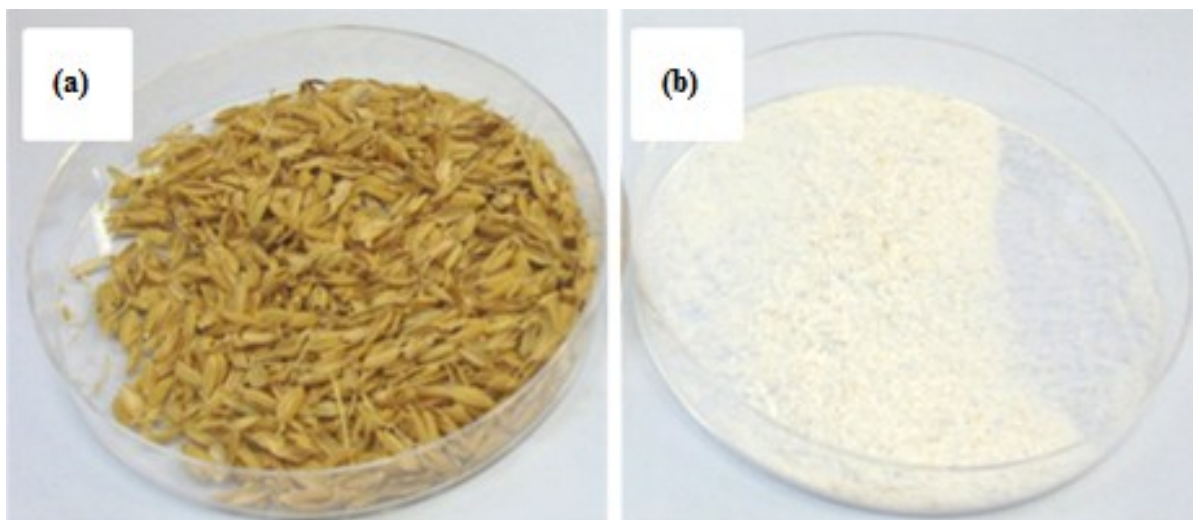

**Fig. S4** Physical appearance of (a) rice husks (b) purified silica particles

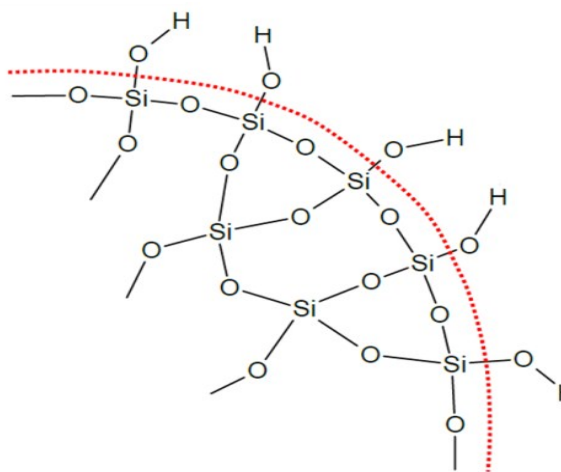

**Fig. S5** Molecular structure of porous silica
